# Supplementary material
Source: ML conference proceedings conference paper supplement (https://proceedings.neurips.cc/paper_files/paper/2009/hash/13f9896df61279c928f19721878fac41-Abstract.html)
Supplement: Supplementary file [file 13f9896df61279c928f19721878fac41-Supplemental.zip]

## A Proof of Lemma 4

*Proof.* Proof of Lemma 4 Let  $c \in \mathcal{C}$  be an optimal decision tree, i.e., a size  $t$  decision tree that maximizes correlation for  $\mathcal{U}_f$ , i.e.,  $\text{cor}(c) = \text{cor}(\mathcal{C})$ . The Fourier representation of  $c$  is,

$$c = \sum_{S \subseteq [n]} \hat{c}(S) \chi_S(x), \quad (4)$$

where  $[n]$  denotes  $\{1, 2, \dots, n\}$ ,  $\hat{c}(S) \in [-1, 1]$ , and parity classifier  $\chi_S(x) = \prod_{i \in S} x[i]$  where  $x[i]$  is the  $i$ th coordinate of  $x$ . Kushilevitz and Mansour show that if  $c$  has at most  $t$  leaves then  $\sum_{S \subseteq [n]} |\hat{c}(S)| \leq t$ . Now,

$$\text{cor}(\mathcal{C}) = \text{cor}(c) = \mathbb{E}_{(x,y) \sim \mathcal{U}_f} [c(x)y] = \sum_{S \subseteq [n]} \hat{c}(S) \text{cor}(\chi_S)$$

Hence,  $\max_{S \subseteq [n]} |\text{cor}(\chi_S)| \geq \text{cor}(\mathcal{C})/t$  (otherwise the quantity displayed above on the left would be less than  $\sum_{S \subseteq [n]} |\hat{c}(S)| \text{cor}(\mathcal{C})/t \leq \text{cor}(\mathcal{C})$ , a contradiction). For any  $\tau > 0$ , the KM algorithm with  $\text{poly}(n, 1/\tau, \log(1/\delta))$  queries and runtime outputs estimates of the correlations  $\text{cor}(\chi_S)$  (these are exactly the estimated Fourier coefficients  $\hat{f}(S)$ ) for each  $S$  that are accurate to within an additive  $\tau$ , with probability  $\geq 1 - \delta$  (there is a sparse polynomial-sized approximation using the fact that at most  $1/\tau^2$  sets  $S$  can have  $|\text{cor}(\chi_S)| \geq \tau$ ). Hence, if we take the set  $S$  for which KM estimates  $|\text{cor}(\chi_S)|$  to be largest, it will have an correlation within  $2\tau$  of that of the best  $S$ . Hence, setting  $\tau = \epsilon_0/2$  suffices for the Lemma. Note that if  $\text{cor}(\chi_S) < 0$ , one simply outputs the classifier  $-\chi_S$ .  $\square$

## B Proof of Theorem 3

We first prove Lemma 5.

*Proof of Lemma 5.* Let  $c : \{-1, 1\}^n \rightarrow \{-1, 1\}$ , and let  $c_d$  be the degree- $d$  truncated Fourier approximation of  $c$ , which is the best degree- $d$  approximation to  $c$  under the uniform distribution over  $x \in \{-1, 1\}^n$ . It is well-known that, in terms of the Fourier approximation equation 4,  $c_d = \sum_{S: |S| \leq d} \hat{c}(S) \chi_S(x)$ .

Klivans, O'Donnell, and Servedio [25] have shown that, for any  $0 < \epsilon < \frac{1}{2}$ ,  $d = \frac{20}{\epsilon^2}$ , and any  $n \geq 1$  and any halfspace  $c(x) = \text{sign}(w \cdot x - \theta)$ ,

$$\mathbb{E}_{x \sim \mathcal{U}} [(c(x) - c_d(x))^2] \leq \epsilon$$

In particular, let  $c$  be the best halfspace approximation to  $f$ , i.e., one with maximum correlation, and let  $c_d$  be its degree- $d$  truncation. Then,

$$\text{cor}(c_d, \mathcal{U}_f) = \text{cor}(c, \mathcal{U}_f) - \text{cor}(c - c_d, \mathcal{U}_f) = \text{cor}(\mathcal{C}, \mathcal{U}_f) - \mathbb{E}_{(x,y) \sim \mathcal{U}_f} [(c(x) - c_d(x))y]$$

Now, by Cauchy-Schwartz,

$$\mathbb{E}_{(x,y) \sim \mathcal{U}_f} [(c(x) - c_d(x))y] \leq \sqrt{\mathbb{E}_{(x,y) \sim \mathcal{U}_f} [(c(x) - c_d(x))^2] \mathbb{E}_{(x,y) \sim \mathcal{U}_f} [y^2]} \leq \sqrt{\epsilon \cdot 1}$$

Hence,  $\text{cor}(c_d) \geq \text{cor}(\mathcal{C}) - \sqrt{\epsilon}$ . Now,

$$\text{cor}(c_d) = \sum_{S: |S| \leq d} \hat{c}(S) \text{cor}(\chi_S) \leq \sum_{S: |S| \leq d} |\hat{c}(S)| \max_{S: |S| \leq d} |\text{cor}(\chi_S)|$$

Finally,  $\sum_{S: |S| \leq d} |\hat{c}(S)| \leq n^d$  (since each  $\hat{c}(S) \in [-1, 1]$  and there are  $\leq n^d$  of them), hence there must be some set  $S$  of size  $\leq d$  for which  $|\text{cor}(\chi_S)| \geq (\text{cor}(\mathcal{C}) - \sqrt{\epsilon})/n^d$ . Substituting  $\epsilon = \epsilon_0^2$  proves the lemma.  $\square$

Theorem 3 now follows easily from the above lemma and our boosting theorem.

*Proof of Theorem 3.* Consider the weak learner simply finds the degree- $d$  term,  $\chi_S(x)$  with  $|S| \leq d$ , with greatest empirical correlation  $\frac{1}{m} \sum_{i=1}^m \chi_S(x_i) y_i$  on a data set  $(x_1, y_1), \dots, (x_m, y_m)$ . Standard Chernoff-Hoeffding bounds guarantee that, for  $m \geq \text{poly}(\log(1/\delta), n^d)$ , with probability  $\geq 1 - \delta$ , the empirical correlation of each of the  $\leq n^d$  different  $\chi_S$ 's will be within  $\epsilon_0/4$  of their true correlation.  $\square$
